# Supplementary material
Source: publisher figshare collection journal article supplement (https://plos.figshare.com/articles/dataset/_/6252134)
Supplement: Supplementary file [file 1]

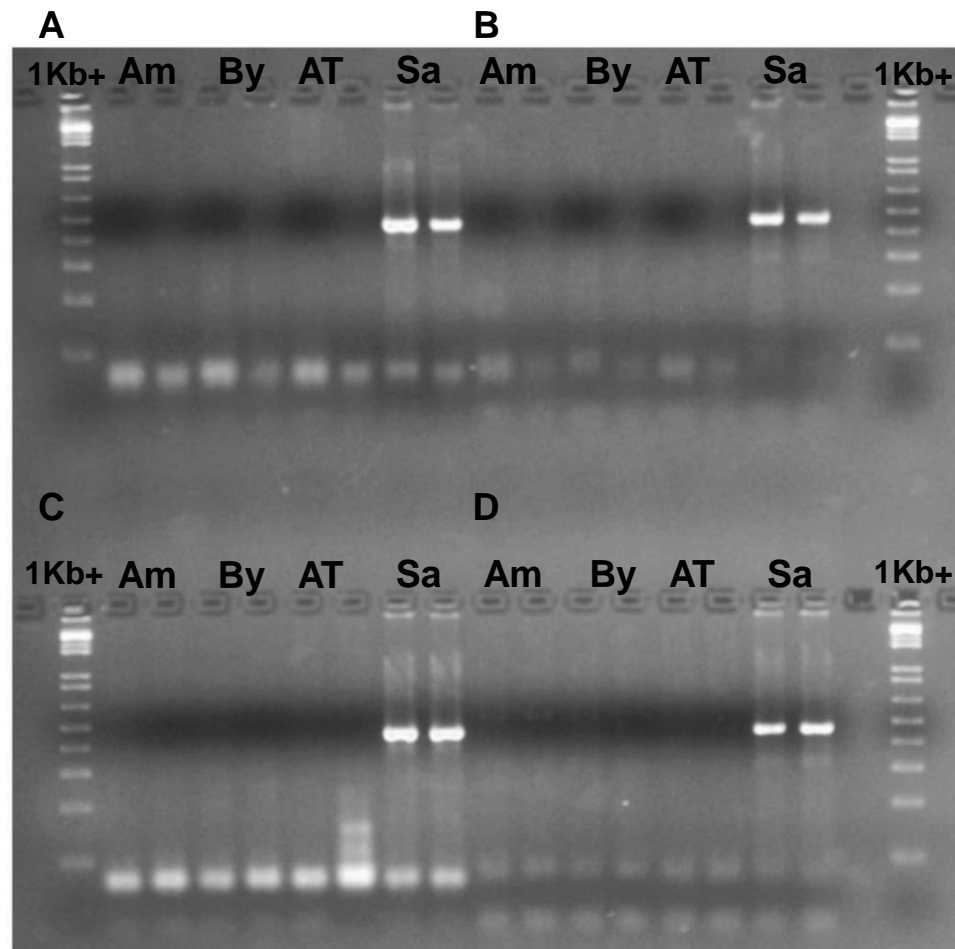

**S3 Fig. Banding pattern of the PCR products for the NBS-LRR-specific primers associated with *Lr14a*.** (A) 4406F/4840R. (B) 4406F/4852R. (C) 4407F/4840R. (D) 4407F/4852R. 1Kb+, DNA ladder; Am, Amria; By, Byblos; AT, ATRED #2; Sa, Sachem (*Lr14a*+).
