# Supplementary material
Source: publisher figshare collection journal article supplement (https://plos.figshare.com/articles/dataset/_/6252134)
Supplement: Supplementary file [file 1]

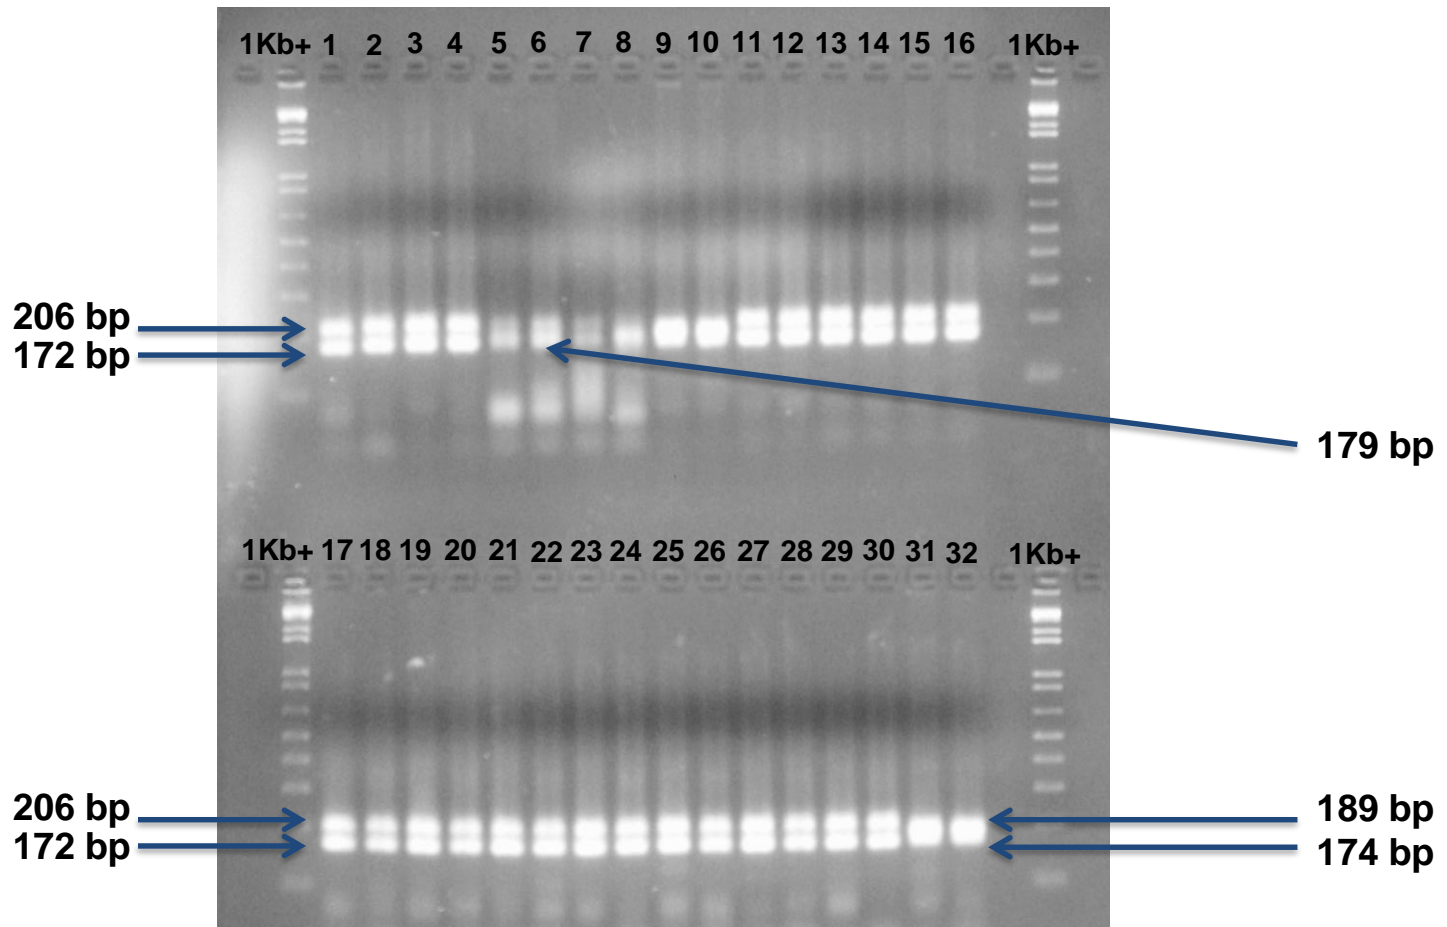

**S2 Fig. PCR amplicons for the SSR marker *Xgwm146* linked to *Lr14a*.**  
 1Kb+, DNA ladder; lanes 1-4, Amria; 5-8, Byblos; 9-10, Sachem (*Lr14a*+); 11-14; resistant RILs from Amria/ATRED #2; 15-18, resistant RILs from Byblos/ATRED #2; 19-22; susceptible RILs from Amria/ATRED #2; 23-26, susceptible RILs from Byblos/ATRED #2; 27-30, ATRED #2; and 31-32, Sachem (*Lr14a*+).
