# Supplementary material
Source: publisher figshare collection journal article supplement (https://plos.figshare.com/articles/dataset/_/6252134)
Supplement: Supplementary file [file 1]

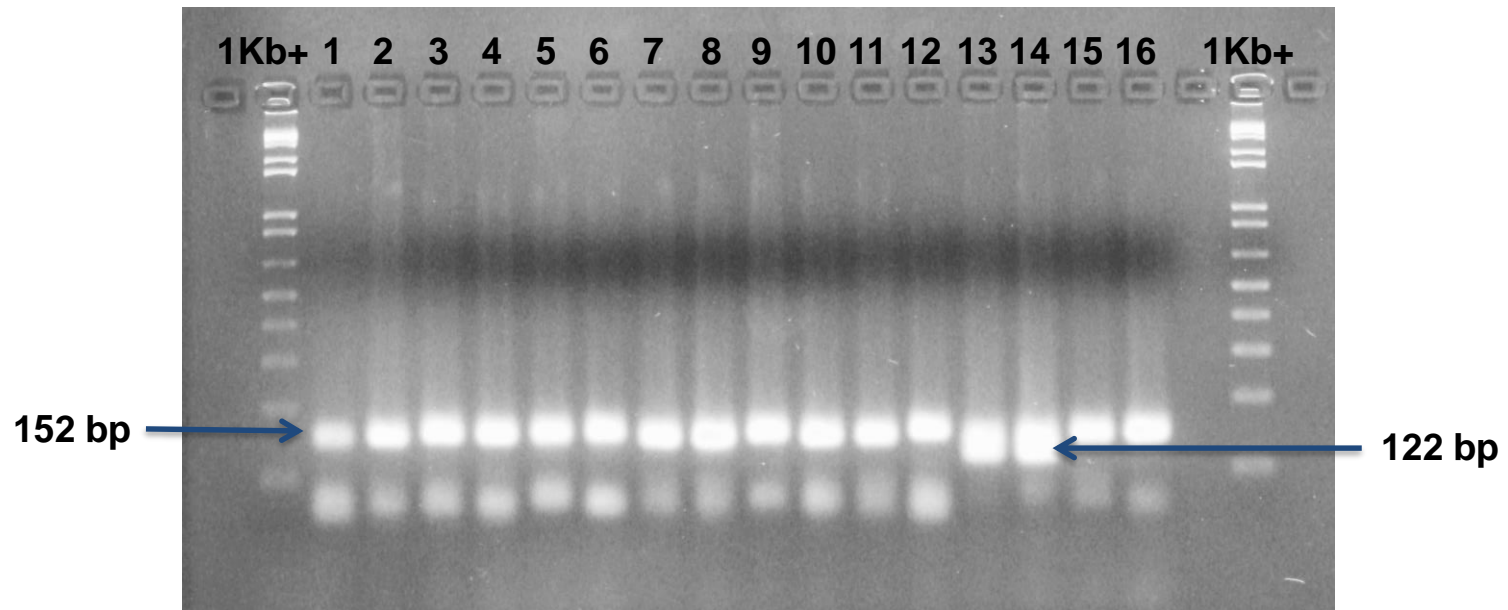

**S1 Fig. PCR amplicons for the SSR marker *Xgwm344* linked to *Lr14a*.** 1Kb+, DNA ladder; lanes 1-2, Amria; 3-4; resistant RILs from Amria/ATRED #2, 5-6; susceptible RILs from Amria/ATRED #2; 7-8, Byblos; 9-10, resistant RILs from Byblos/ATRED #2; 11-12, susceptible RILs from Byblos/ATRED #2; 13-14, Sachem (*Lr14a+*); and 15-16, ATRED #2.
