# Supplementary material
Source: publisher figshare collection journal article supplement (https://plos.figshare.com/articles/dataset/_/6252134)
Supplement: Supplementary file [file 1]

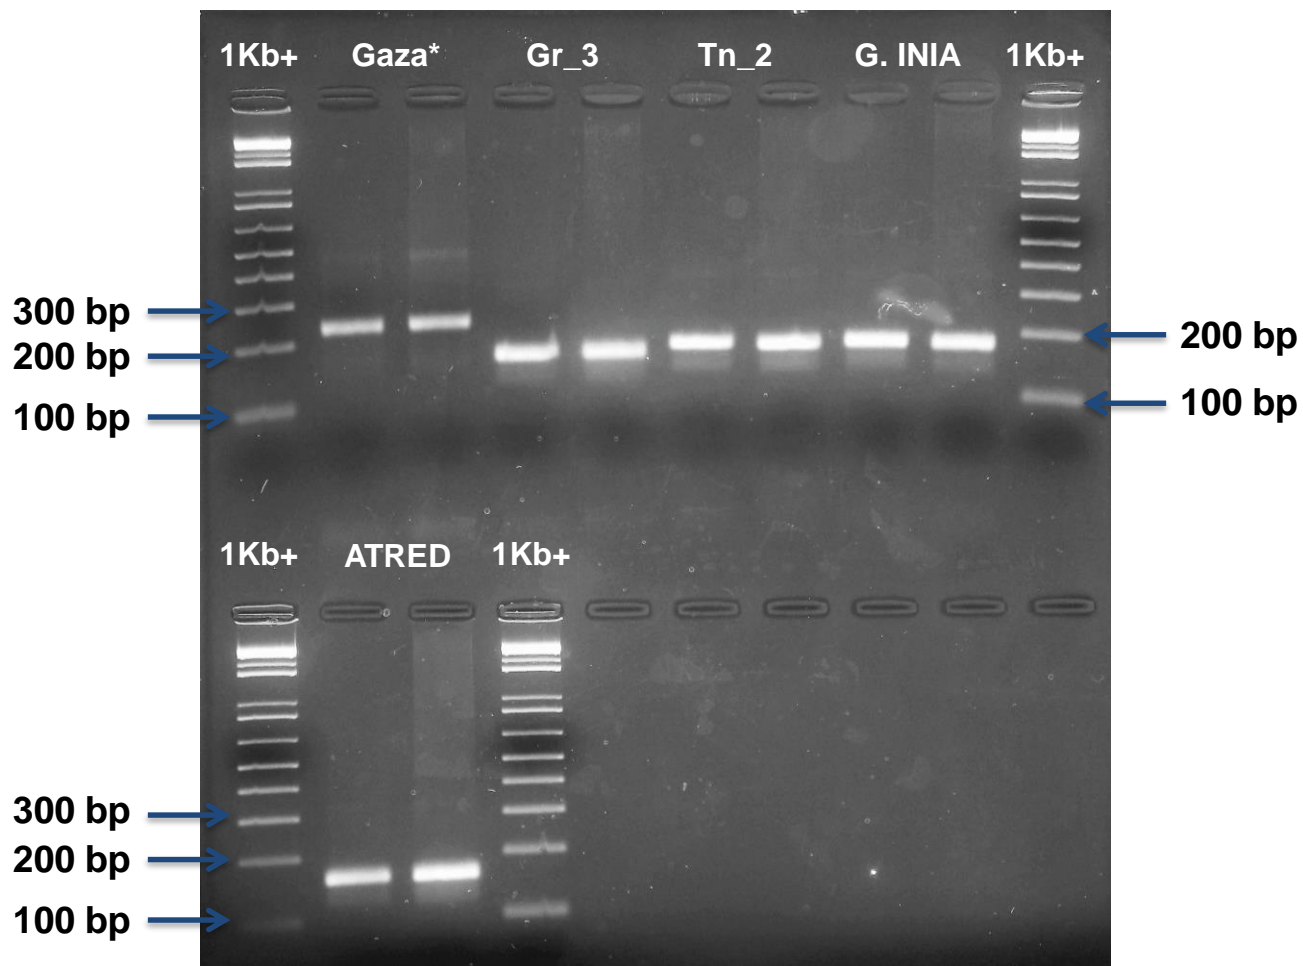

**S4 Fig. PCR amplicons for the SSR marker *Xwmc487* linked to *Lr61*.**

1Kb+, DNA ladder; Gr\_3, Geromtel\_3; Tn\_2, Tunsyr\_2; G. INIA, Guayacan INIA (*Lr61+*); ATRED, ATRED #2.

\* Gaza is a durum wheat landrace carrying leaf rust resistance on chromosome 6BS (D. Kthiri, manuscript in preparation).
